# Supplementary material
Source: MDPI journal article supplement (https://www.mdpi.com/2297-8739/10/7/404)
Supplement: s1 [file s1]

Supplementary material for

## Design strategy for performance enhancement of vertical plate microdistillators

Yosuke Muranaka, Taisuke Maki, Kosuke Nishigaya, Kazuhiro Mae

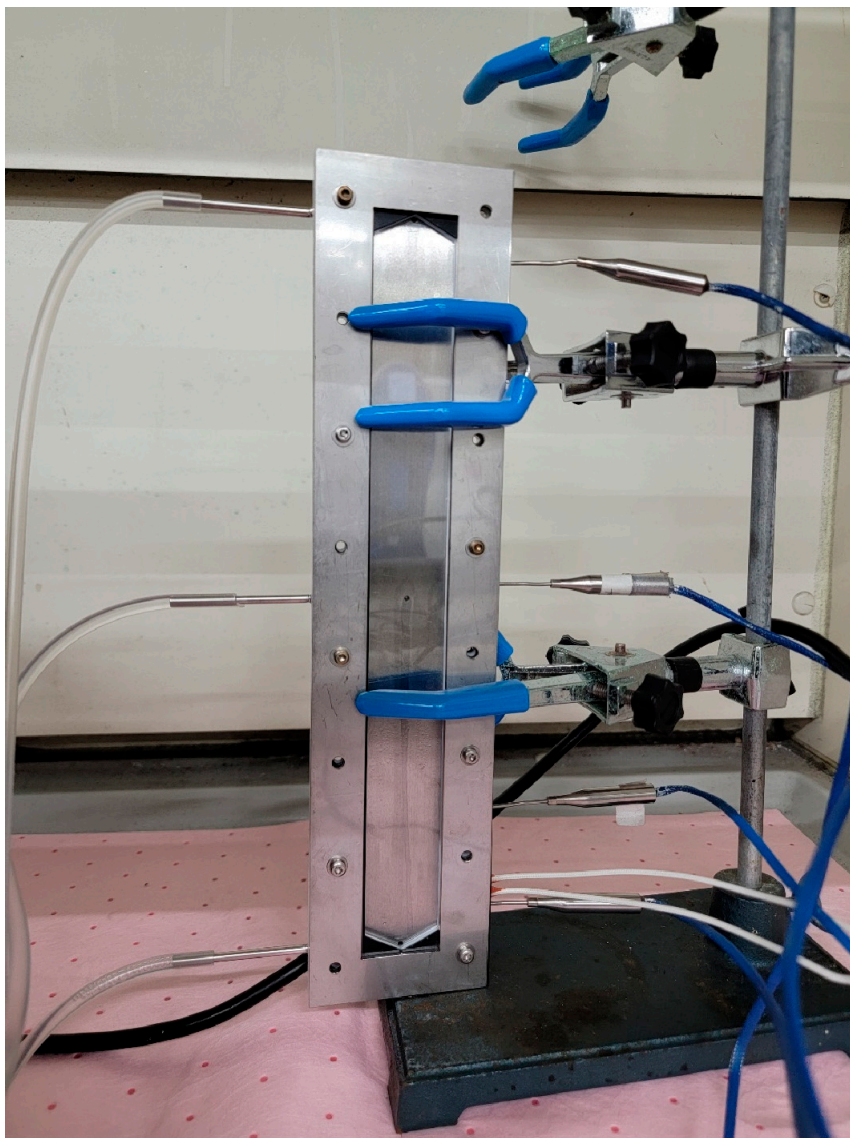

Figure S1. The picture of the device under operation. Feedstock was 50/50 (w/w) EA-toluene, channel length = 275 mm, width = 30 mm, thickness = 1.0 mm, heater temperature = 125 °C, feedstock flow rate = 1.0 mL/min, device angle = 90 °.
